# Supplementary material for: Electrospun BiOI nano/microtectonic plate-like structure synthesis and UV-light assisted photodegradation of ARS dye
Source: Royal Society of Chemistry journal article supplement (doi:10.1039/c4ra00579a), 2014-01-01
Supplement: c4ra00579a1.pdf [file c4ra00579a1.pdf]

## Supplementary Information

### Electrospun BiOI nano/microtechtonic plate like structures synthesis and UV light assisted photodegradation of ARS dye.

Veluru Jagadeesh Babu<sup>\*a</sup>, R S R Bhavatharini<sup>b</sup>, and Seeram Ramakrishna<sup>\*b,c</sup>

<sup>a</sup>UNAM-National Nanotechnology Research Center, Bilkent University, Ankara, 06800, Turkey.

<sup>b</sup>Center for Nanofibers and Nanotechnology, Nanoscience and Nanotechnology Initiative (NUSNNI), National University of Singapore, Singapore-117576,

<sup>c</sup>Department of Mechanical Engineering, National University of Singapore, Singapore-117576, Singapore.

<sup>\*</sup>Corresponding Authors: E-mail: [babu@unam.bilkent.edu.tr](mailto:babu@unam.bilkent.edu.tr) (V J Babu), [seeram@nus.edu.sg](mailto:seeram@nus.edu.sg) (S Ramakrishna).

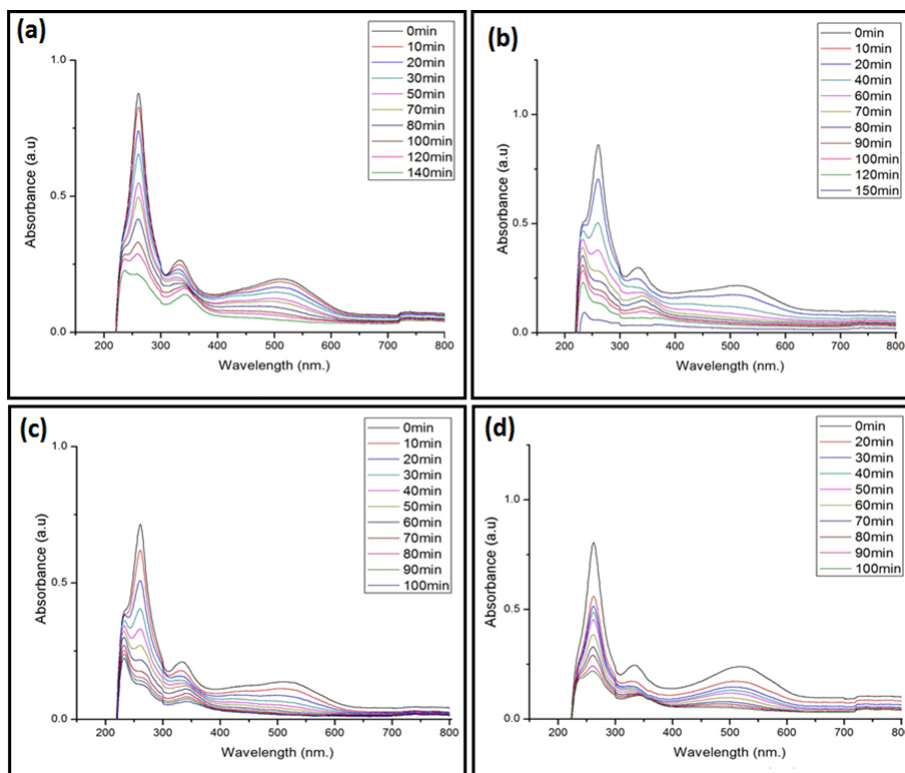

**SI 1:** Spectral changes during UV-catalytic degradation for BiOI at (a) x=1%, (b) x=2%, (c) x=3% and (d) x=4% (w/v).
